# Supplementary material for: A hierarchical nano-MoS2 flake/micro-MXene lamellar complex structure within a carbon coating for rapid sodium-ion storage
Source: Royal Society of Chemistry journal article supplement (doi:10.1039/d3ta08010b), 2024-01-01
Supplement: d3ta08010b1.pdf [file d3ta08010b1.pdf]

**Hierarchical nano-MoS<sub>2</sub> flake/micro-MXene lamellar complex structure within carbon coating for rapid sodium-ion storage**

Bingjie Wen<sup>a</sup>, Nizao Kong<sup>a</sup>, Min Huang<sup>a</sup>, Liqin Fu<sup>a</sup>, Yexin Tian<sup>a</sup>, Zhixiao Liu<sup>a</sup>, Zhongchao Wang<sup>a</sup>, Lezhi Yang<sup>b</sup> and Fei Han<sup>a,\*</sup>

<sup>a</sup> *Hunan Province Key Laboratory for Advanced Carbon Materials and Applied Technology, College of Materials Science and Engineering, Hunan University, Changsha 410082, China*

<sup>b</sup> *Changsha Research Institute of Mining&Metallurgy Co., LTD*

\*Corresponding author.

*E-mail address:* feihan@hnu.edu.cn (Fei Han)

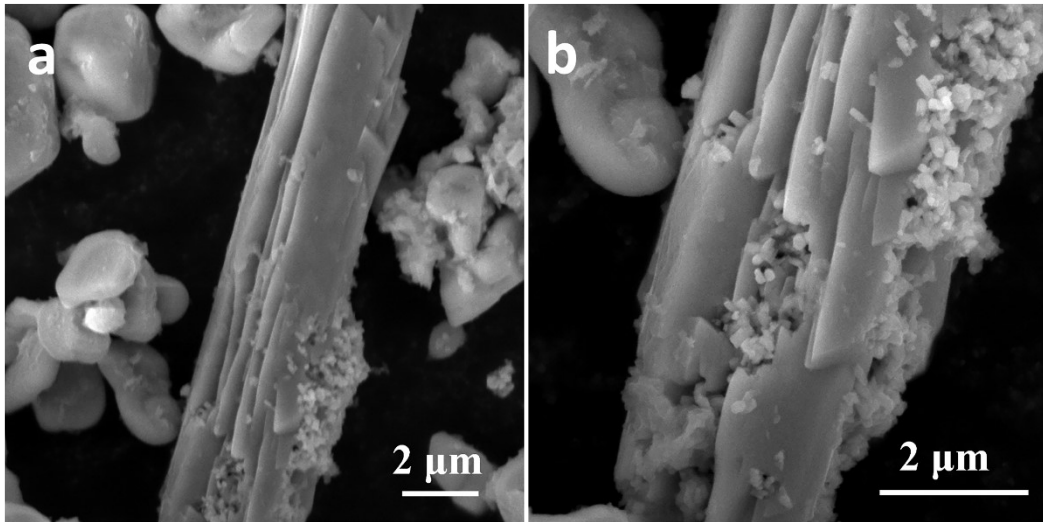

**Figure S1.** SEM images of  $\text{MoCl}_x/\text{V}_2\text{C}$  at different magnifications.

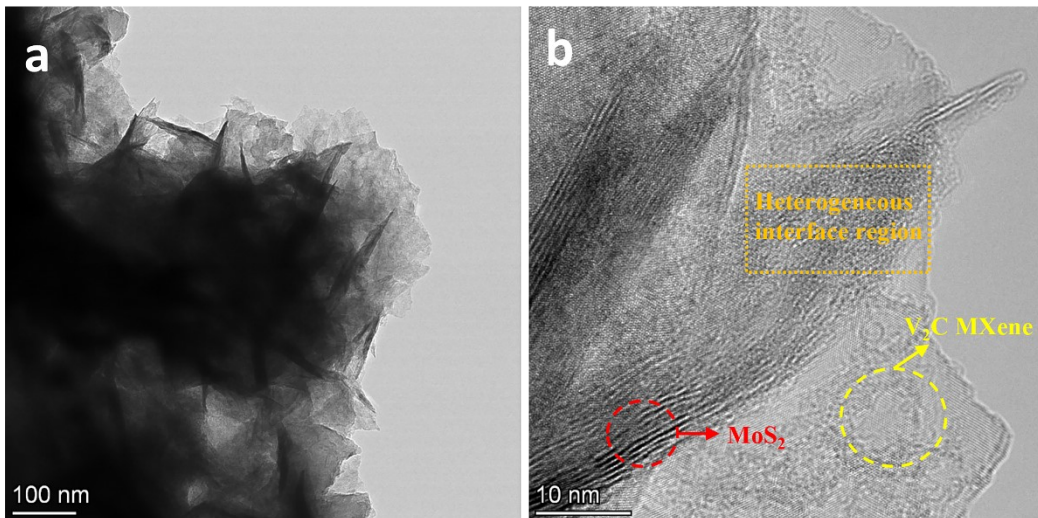

**Figure S2.** (a) TEM image, (b) HRTEM image of MSVC.

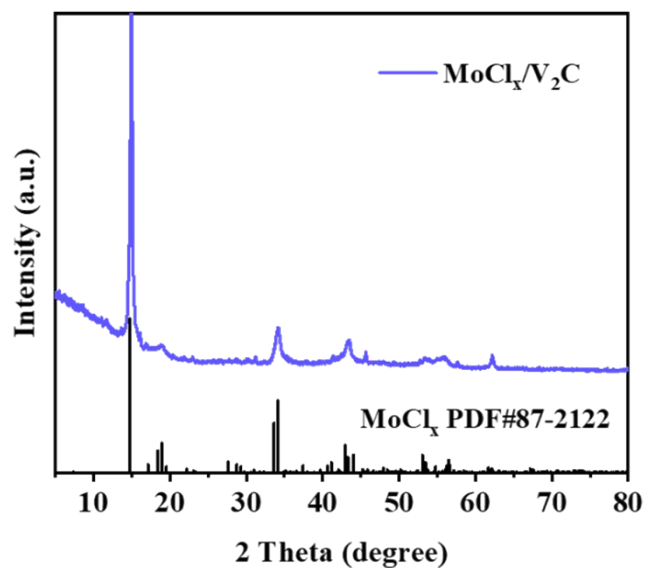

**Figure S3.** XRD pattern of  $\text{MoCl}_x/\text{V}_2\text{C}$ .

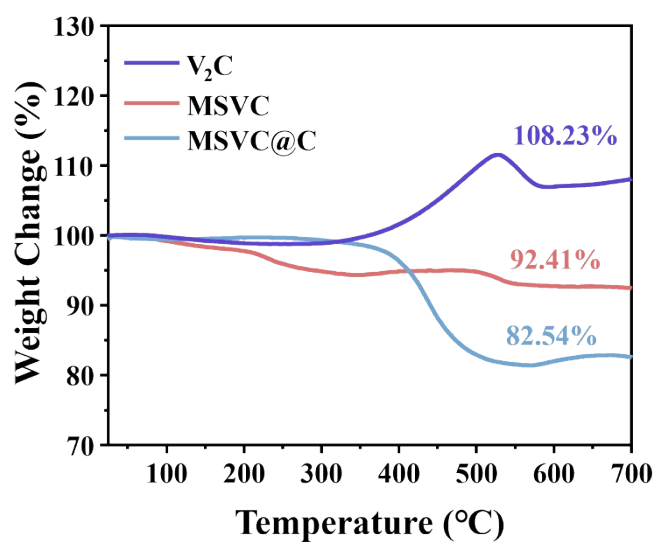

**Figure S4.** TGA curves of  $\text{V}_2\text{C}$ , MSVC, and  $\text{MSVC}@C$ .

**The detailed calculation process of TGA was as follows :**

The original masses of  $\text{V}_2\text{C}$ , MSVC and  $\text{MSVC}@C$  samples are denoted as  $m_{\text{V}_2\text{C}}^0$ ,  $m_{\text{MSVC}}^0$  and  $m_{\text{MSVC}@C}^0$ . The weight loss below 200 °C is due to the evaporation of water and residual HF. The masses of the samples at 200 °C are recorded as  $m_{\text{V}_2\text{C}}^1$ ,

$m_{MSVC}^1$  and  $m_{MSVC@C}^1$ , respectively. The subsequent change in weight to 700 °C can be attributed to the oxidation of V<sub>2</sub>C MXene, MoS<sub>2</sub> and carbon coating. The final masses of three samples are named as  $m_{V2C}^2$ ,  $m_{MSVC}^2$  and  $m_{MSVC@C}^2$ , respectively.

From the TGA curves:

$$m_{V2C}^1 = 0.9887m_{V2C}^0, m_{MSVC}^1 = 0.9771m_{MSVC}^0, m_{MSVC@C}^1 = 0.9966m_{MSVC@C}^0$$

$f_x$  is represent the rate of mass change, and  $\omega_x$  is represent the mass content of a certain component, then:

$$f_{V2C} = \frac{m_{V2C}^2}{m_{V2C}^1} = \frac{1.0823m_{V2C}^0}{0.9887m_{V2C}^0} = 1.0947$$

$$f_{MSVC} = \frac{m_{MSVC}^2}{m_{MSVC}^1} = \frac{0.9241m_{MSVC}^0}{0.9771m_{MSVC}^0} = f_{V2C} \times \omega_{V2C} + f_{MoS2} \times \omega_{MoS2}$$

Since MoS<sub>2</sub> is all oxidized to MoO<sub>3</sub> at high temperature, and

$$f_{MoS2} = \frac{M_{MoO3}}{M_{MoS2}} = \frac{143.958}{160.07}$$

is obtained. For the MSVC composite,  $\omega_{V2C} + \omega_{MoS2} = 1$ ,

and the final calculation gives:  $\omega_{MoS2} = 82.95\%$ ,  $\omega_{V2C} = 17.05\%$ .

As for the MSVC@C sample, the carbon coating is completely oxidized and volatilized at a high temperature. Therefore:

$$f_{MSVC@C} = \frac{m_{MSVC@C}^2}{m_{MSVC@C}^1} = \frac{0.8254m_{MSVC@C}^0}{0.9966m_{MSVC@C}^0} = f_{MSVC} \times \omega_{MSVC}$$

$$\omega_{MSVC} = 87.57\%, \text{ and } \omega_{Carbon}^* = 1 - \omega_{MSVC} = 12.43\%$$

$$\omega_{MoS2}^* = \omega_{MoS2} \times \omega_{MSVC} = 72.64\%, \text{ and } \omega_{V2C}^* = \omega_{V2C} \times \omega_{MSVC} = 14.93\%$$

In summary, the content of each component in MSVC@C composite is:

$$\omega_{MoS2}^* = 72.64\%, \omega_{V2C}^* = 14.93\%, \omega_{Carbon}^* = 12.43\%, \text{ respectively}$$

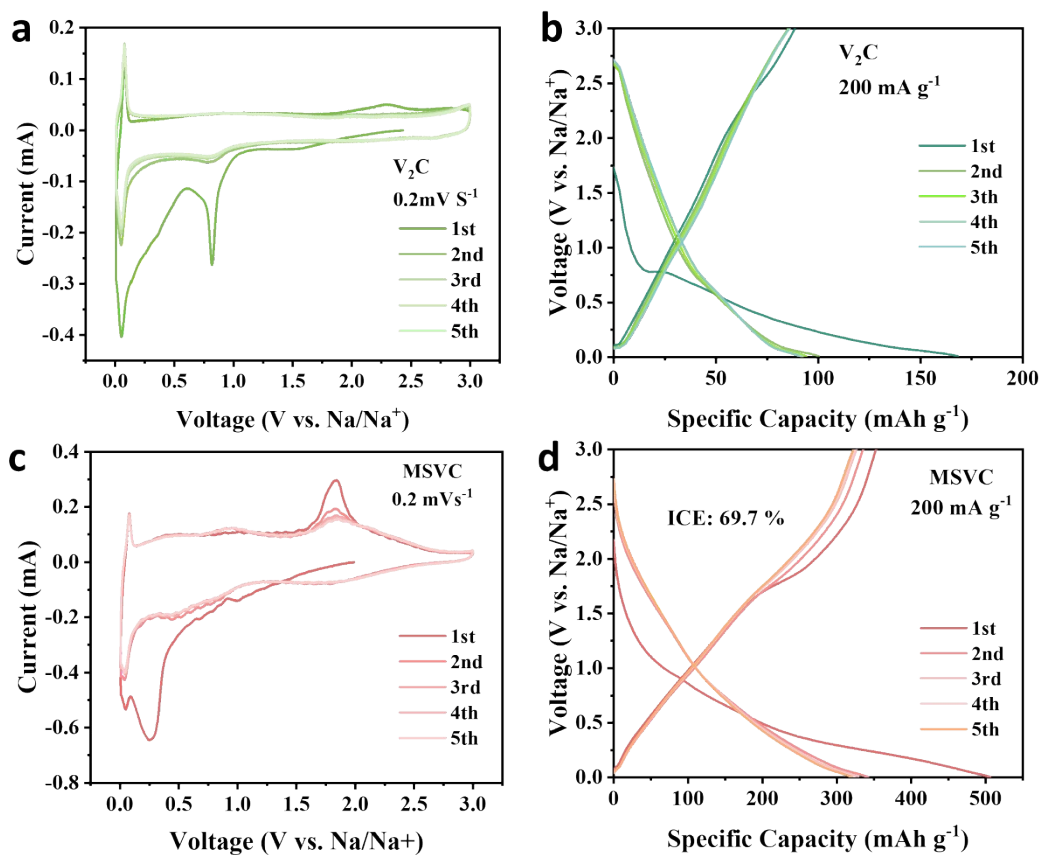

**Figure S5.** (a) CV curves and (b) GCD profiles for the initial five cycles of V<sub>2</sub>C. (c) CV curves and (d) GCD profiles for the initial five cycles of MSVC.

**Table S1.** Kinetic parameters are calculated by fitting an equivalent circuit of two electrodes after cycling.

| Sample | R <sub>s</sub> | R <sub>ct</sub> |
|--------|----------------|-----------------|
| MSVC@C | 4.46           | <b>6.09</b>     |
| MSVC   | 9.60           | <b>25.26</b>    |

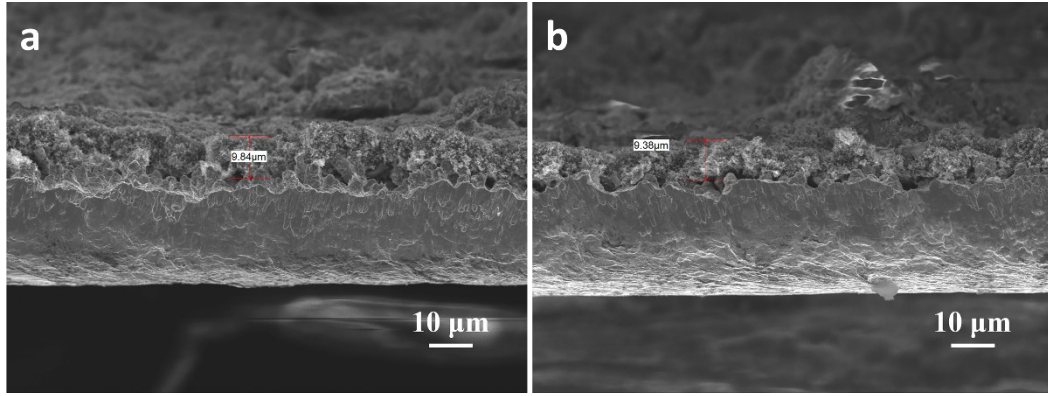

**Figure S6.** SEM images of (a) the MSVC@C electrode film and (b) the MSVC@C electrode film.

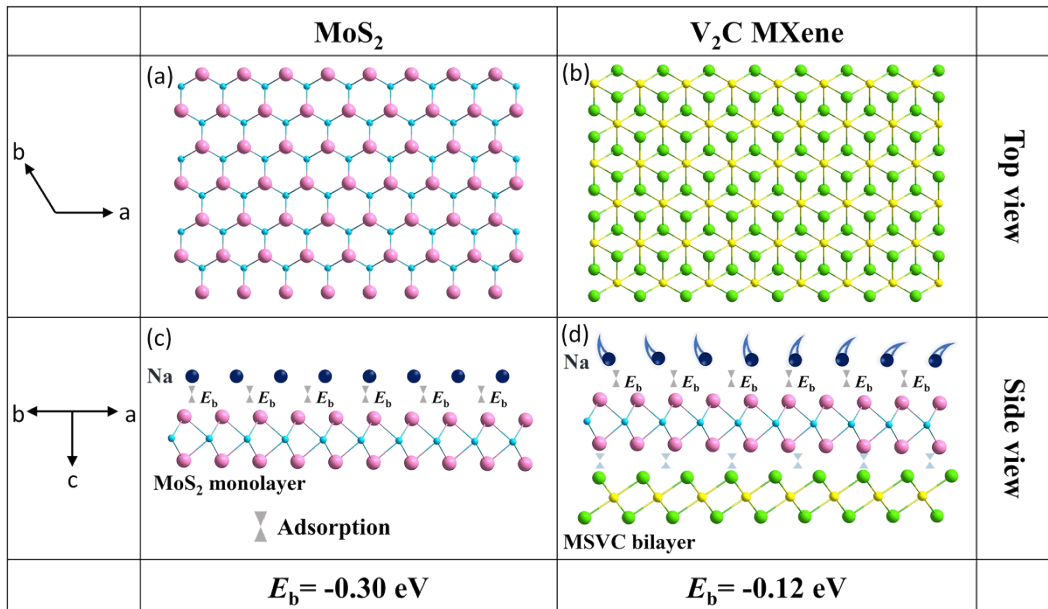

**Figure S7.** Structural models of (a) MoS<sub>2</sub> and (b) V<sub>2</sub>C MXene. Simulated adsorption energies between Na atoms and (c) MoS<sub>2</sub> monolayer, and (d) MSVC bilayer.

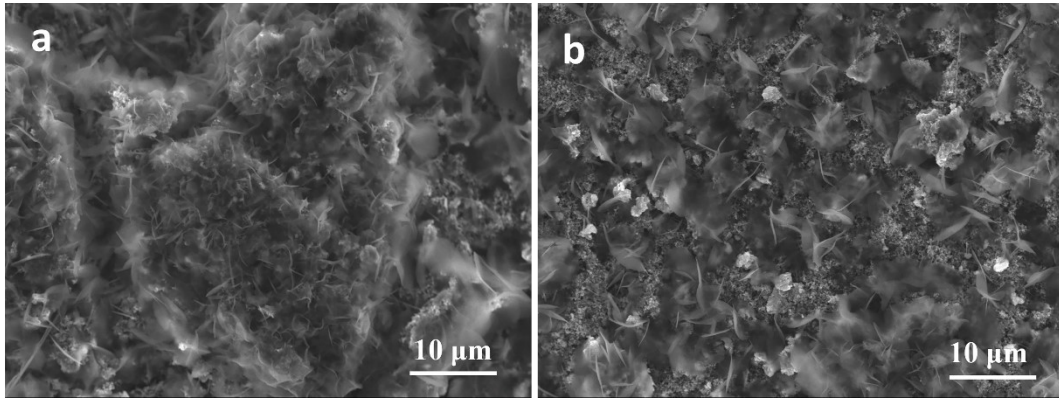

**Figure S8.** SEM images of MSVC electrode after 100 cycles at  $0.5 \text{ A g}^{-1}$ .

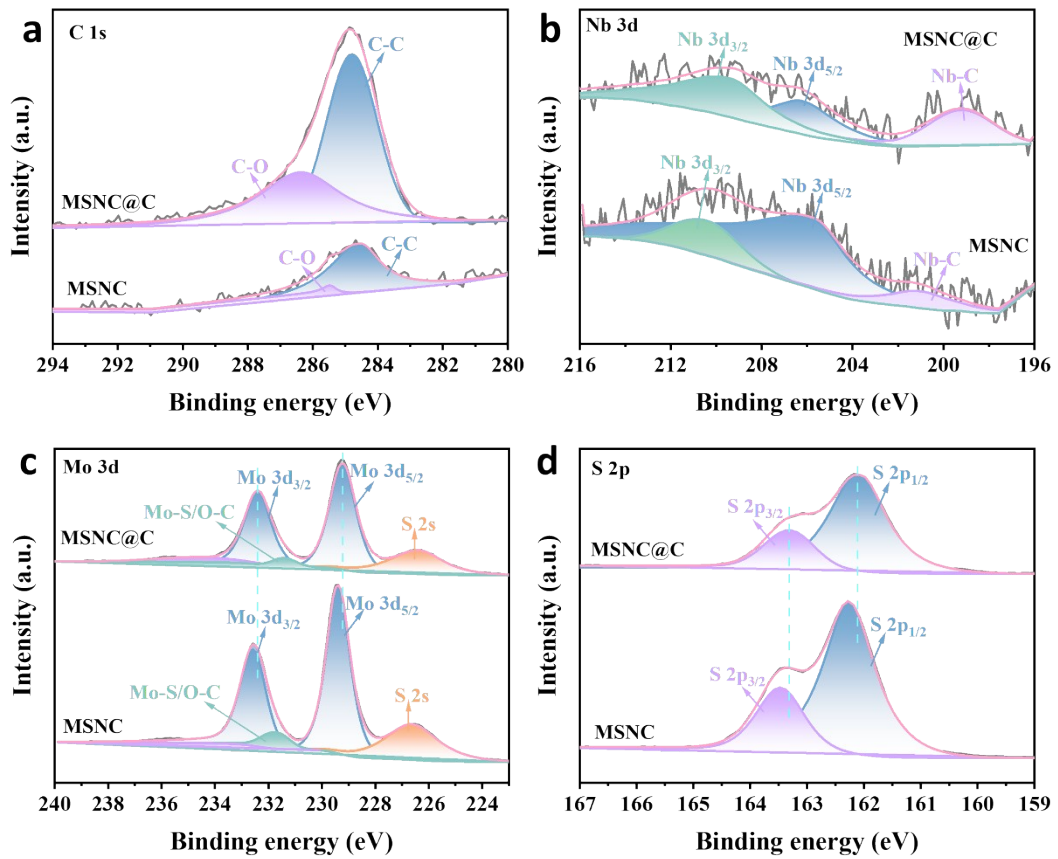

**Figure S9.** XPS high-resolution spectra of (a) C 1s, (v) Nb 3d, (c) Mo 3d, and (d) S 2p of MSVC@C and MSNC.

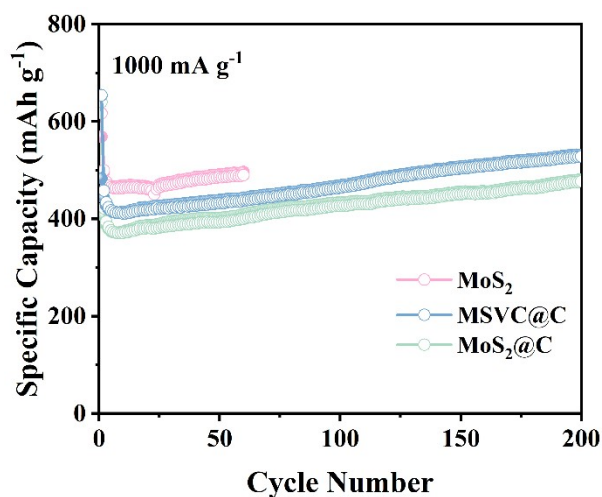

**Figure S10.** The cycling performance of MSVC@C, MSNC@C, MoS<sub>2</sub>, and MoS<sub>2</sub>@C at 1000 mA g<sup>-1</sup>.

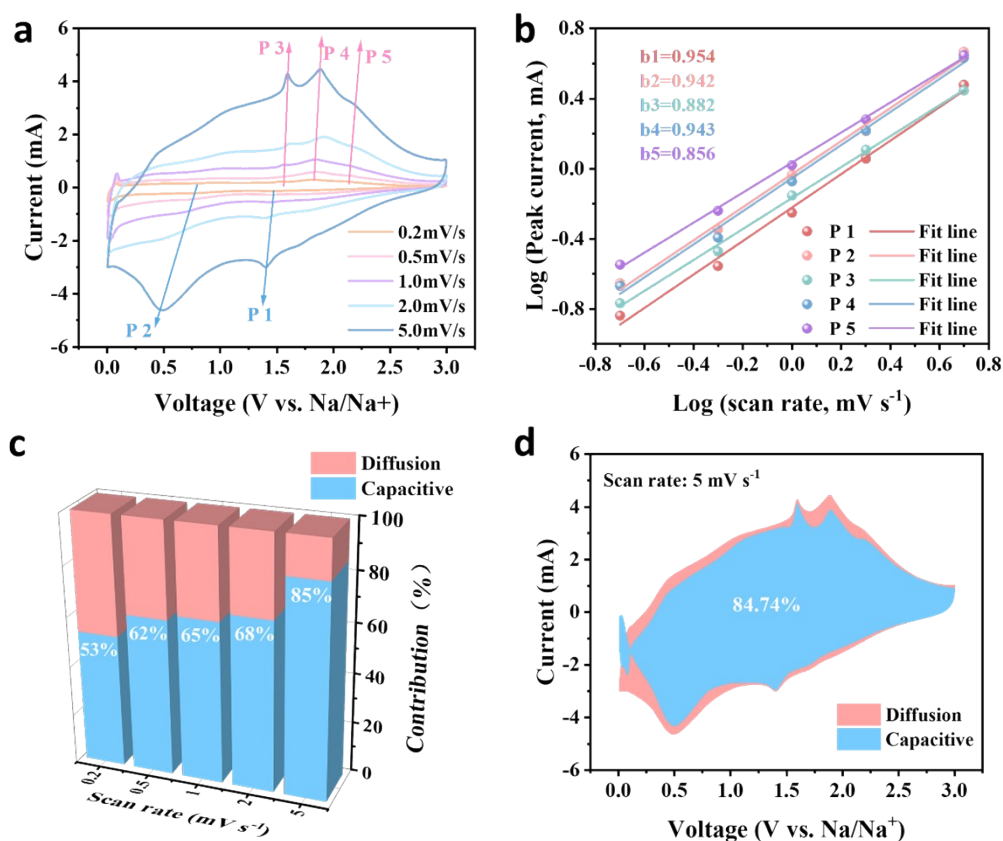

**Figure S11.** (a) CV curves at different scan rates, (b) relationships between the logarithm peak current and logarithm scan rate, (c) percentages of capacitive contribution at different scan rates, and (d) capacitive contribution at 5 mV s<sup>-1</sup> of MSNC@C
